# Supplementary material for: Complement C5a induces PD-L1 expression and acts in synergy with LPS through Erk1/2 and JNK signaling pathways
Source: PubMed Central journal article supplement (PMC5022031; doi:10.1038/srep33346), 2016-09-14

**Complement C5a induces PD-L1 expression and acts in synergy with LPS  
through Erk1/2 and JNK signaling pathways**

Ling-Ling An<sup>1\*</sup>, Jacob V. Gorman<sup>1</sup>, Geoffrey Stephens<sup>1</sup>, Bonnie Swerdlow<sup>1</sup>, Paul Warrener<sup>2</sup>,  
Jessica Bonnell<sup>2</sup>, Tomas Mustelin<sup>1</sup>, Michael Fung<sup>1</sup> and Roland Kolbeck<sup>1</sup>

<sup>1</sup>Department of Respiratory, Inflammation and Autoimmunity; <sup>2</sup>Department of Infectious  
Diseases, MedImmune, LLC, Gaithersburg, MD 20878, USA

## **Supplementary Information**

### **Methods**

#### **Reagents**

Human plasma C5a and C5adesArg were from Comp Tech. PE-Cy7-anti-human C5aR1 (S5/1) and PE-anti-human C5aR2 (1D9-M12) were from BioLegend. Phospho-specific antibodies, Total I $\kappa$ B $\alpha$  (25/I $\kappa$ B $\alpha$ /MAD-3), p38 MAPK (pT183/pY182) (36/p38), p44/42 ERK1/2 (pT202/pY204) (20A) and Akt (M89-61), were from BD Biosciences.

#### **Competent activation in human blood**

Fresh human blood (80  $\mu$ L) was added to each well of a 96-well polypropylene plate. For induction of C5a, serially diluted heat-killed *P. aeruginosa* in PBS (20  $\mu$ L) was added to each well. The plate was incubated by floating on a 37°C water bath for 10 min. After centrifugation at 4°C for 10 min at 2000 rpm, plasma was collected in a 96-well polypropylene plate containing FUT-175 to prevent further complement activation (final concentration at 50  $\mu$ g/mL, BD Biosciences). Plasma C5a was measured using Hu C5a OptEIA ELISA Kit II (BD Biosciences). For induction of cytokines and chemokines, anti-C5/C5a IgG or control IgG was added to each well in triplicates at 130 nM (final concentration). After incubation for 30 min at 37°C with 5% CO<sub>2</sub>, heat-killed *P. aeruginosa* (10  $\mu$ L) was added to each well at final concentration at  $2 \times 10^7$  cfu/mL. Plasma was collected after 20 h incubation at 37°C with 5% CO<sub>2</sub>; cytokines and chemokines were determined using multiplex kit (Meso Scale Discovery).

#### **Activation of signaling pathways**

Human monocytes were plated  $3-5 \times 10^5$  per well in 80  $\mu\text{L}$  X-VIVO™ 15 serum-free medium in a U-bottom 96 well tissue culture plate and sit for 2 h at 37°C with 5% CO<sub>2</sub>. LPS or C5a (final concentration at 100 ng/mL) was added to each well and incubated for (0, 2, 5 and 15 min) at 37°C with 5% CO<sub>2</sub>. Activation was stopped by adding equal volume of Cytifix Buffer (BD Biosciences) for 10 min at the 37°C. After fixation cells were frozen at -80°C overnight. The following day monocytes were thawed at 37°C and permeabilized with -20°C Perm Buffer III (BD Biosciences) on ice for 30 min. After permeabilization cells were washed with 3% FBS in PBS and stained with phospho-specific antibodies for 30 minutes at room temperature prior flow cytometry analysis.

## Supplementary Figure Legends

**Supplementary Figure 1.** (A) Quantification of plasma C5a induced by *P. aeruginosa* 10 min after incision at 37°C in freshly collected human blood. The graph is representative of more than three independent experiments with different healthy donors. Bars represent mean  $\pm$  SEM from triplicate wells. (B) PD-L1 expression on primary monocytes after incubation with C5a or C5adesArg for 20 h at 37°C with 5% CO<sub>2</sub> by flow cytometry (n=3). (C) Quantification of cytokines and chemokine induced by *P. aeruginosa* in the presence of anti-C5/C5a or control IgG after 20 h incubation, n=4-6 from different individual donors. Results represent the mean  $\pm$  SEM. \* $p$  <0.05, \*\* $p$  <0.01 and \*\*\* $p$  <0.005 by one-way ANOVA followed by Sidak's multiple comparisons test.

**Supplementary Figure 2.** The expression of PD-L1 (top), C5aR1(middle) and C5aR2 (bottom) after fresh human blood was challenged with heat-killed *P. aeruginosa* and incubated for 20 h at 37°C with 5% CO<sub>2</sub> by flow cytometry. Data were from 3 healthy donors.

**Table1.** Summary of FACS data from supplementary Figure 2.

**Supplementary Figure 3.** (A) Quantification of the expression of PD-L1 on human primary monocytes induced by *P. aeruginosa* LPS by flow cytometry after 20 h incubation. The graph is a representative of two independent experiments with different healthy donors. Bars represent mean  $\pm$  SEM from triplicate wells. (B) Time course study of signaling pathway activation by C5a or LPS at 100 ng/mL by flow cytometry (n=3).

# Supplementary Figure 1

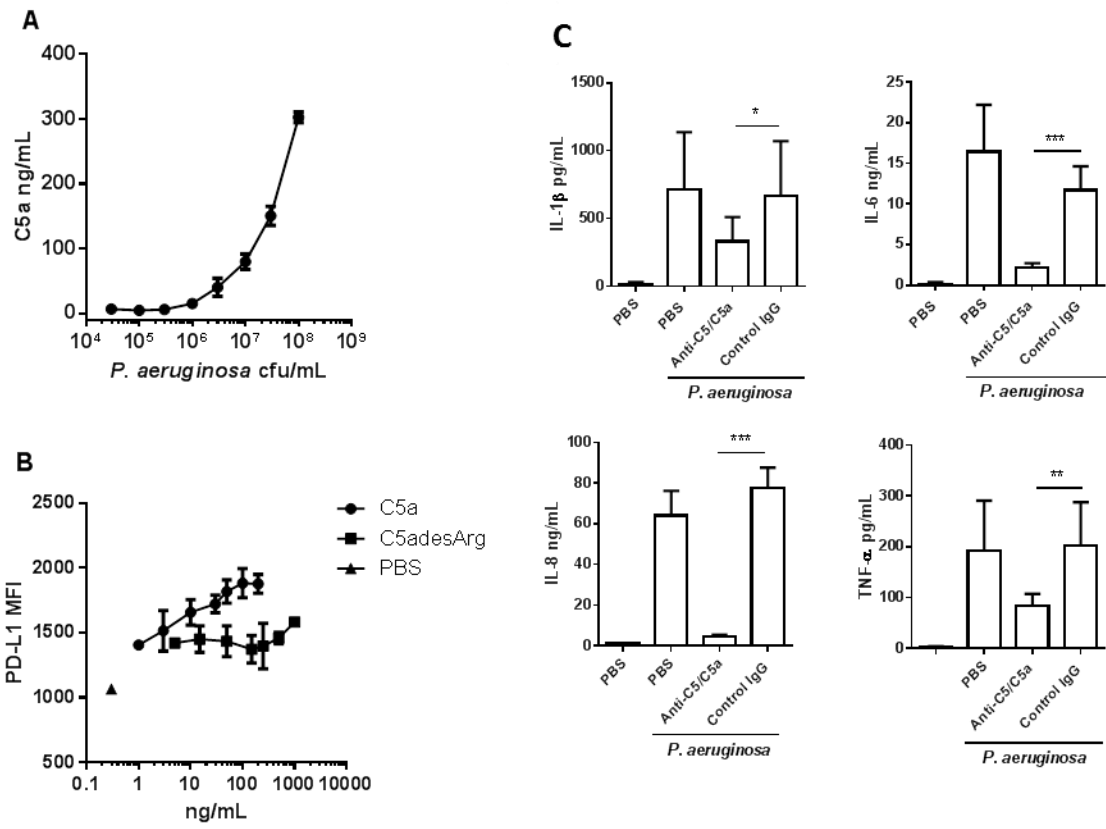

Supplementary Figure 2

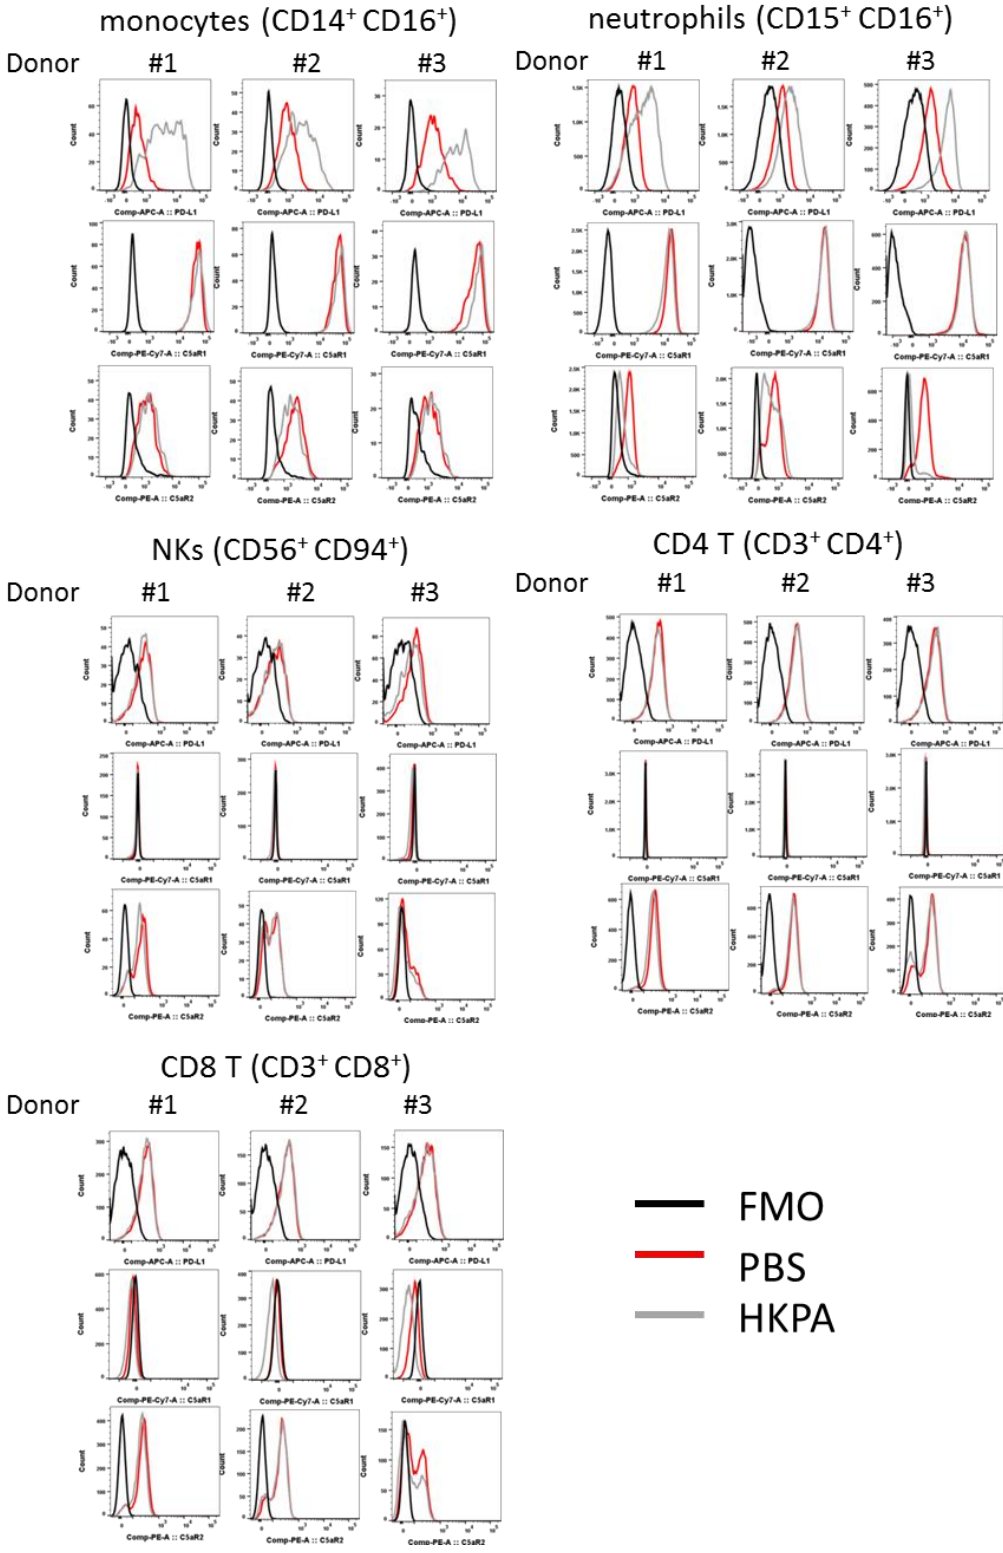

**Table 1**

---

| <b>Cell type</b> | <b>PD-L1</b> | <b>C5aR1</b> | <b>C5aR2</b> |
|------------------|--------------|--------------|--------------|
| monocyte         | -            | -            | ↑↑           |
| neutrophil       | -            | ↓            | ↑↑           |
| NK cell          | -            | -            | -            |
| CD4 T cell       | -            | -            | -            |
| CD8 T cell       | -            | -            | -            |

---

Supplementary Figure 3

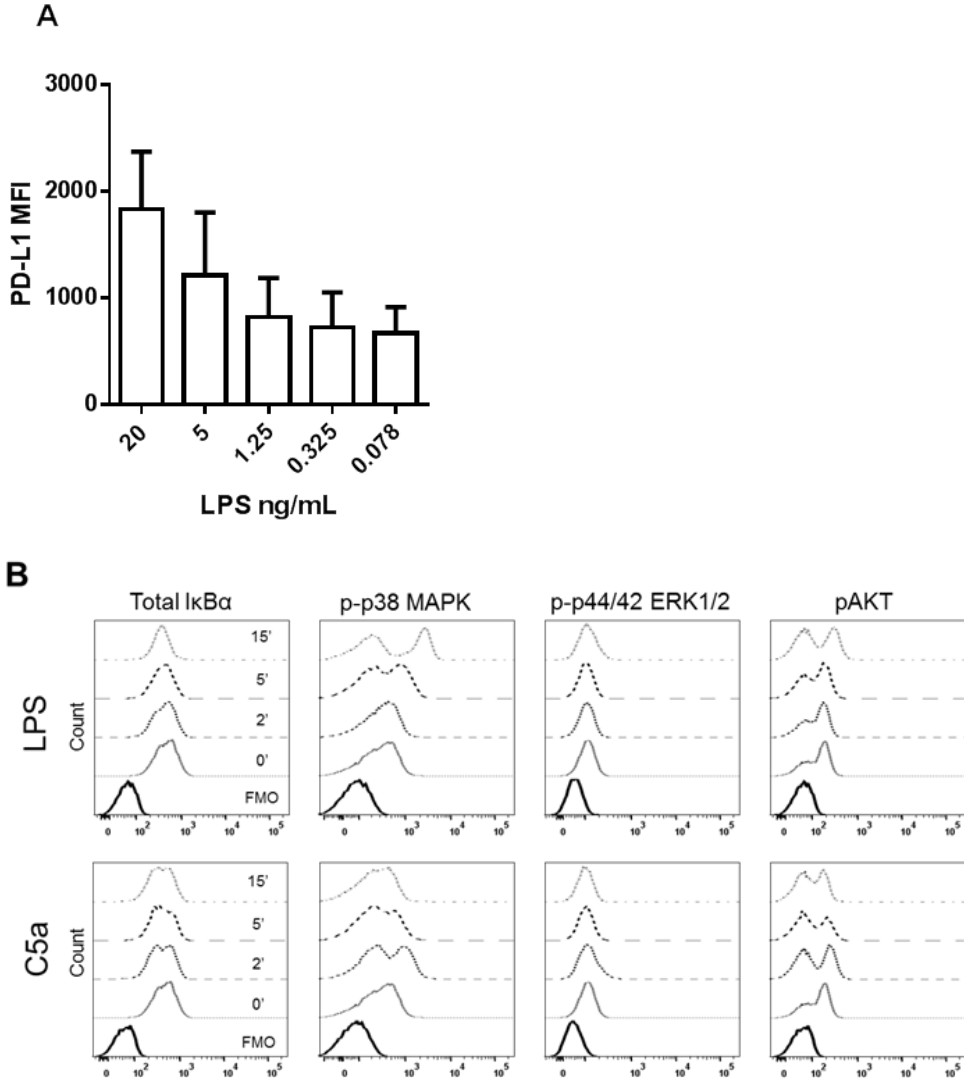

Supplement: srep33346-s1.pdf [file srep33346-s1.pdf]
